# Supplementary material for: Combined Focused Next-Generation Sequencing Assays to Guide Precision Oncology in Solid Tumors: A Retrospective Analysis from an Institutional Molecular Tumor Board
Source: MDPI journal article supplement (doi:10.3390/cancers14184430), 2022-09-12
Supplement: s1 [file s1]

## **Supplementary Materials**

### **Combined focused Next-Generation Sequencing assays to guide precision oncology in solid tumors: a retrospective analysis from an institutional Molecular Tumor Board**

Thomas S. Tarawneh et al.

#### **Contents**

|                                |    |
|--------------------------------|----|
| Supplementary Methods .....    | 1  |
| Supplementary Table S1.....    | 3  |
| Supplementary Table S2.....    | 5  |
| Supplementary Table S3.....    | 8  |
| Supplementary Figure S1 .....  | 16 |
| Supplementary Figure S2 .....  | 18 |
| Supplementary Table S4.....    | 19 |
| Supplementary References ..... | 20 |

## **Supplementary Methods**

### **Calculation of numerical karyotypes by CORIANDR**

CORIANDR is a read-depth based tool for numerical karyotype and CNA estimation from the raw reads of low coverage WGS sequencing. We use a panel of normals (PON) to identify and reduce technical artifacts. The samples for the panel of normals were obtained and sequenced under the same conditions as the tumor samples. R Studio v3.6.3 was used for statistical analysis and reports in markdown. For visualization knitr v1.30, markdown v1.1, rmarkdown v2.6, tinytex v0.28 packages in R Studio were used.

### **Data preparation**

The sequencing data from Illumina MiSeq was aligned to the reference genome with Bowtie 2 v2.3.5.1 [1] in paired-end mode. We used version GRCh38.p13 of the human genome from Genome Reference Consortium as reference genome for alignment. The data was converted to BAM format using samtools v1.10 [2]. We count the reads in the non-overlapping megabase sized bins using featureCounts v2.0.0 [3].

### **Generation of a panel of normals**

To generate a panel of normals, the reads of all PON samples are summed up after counting per bin. The reads on autosomal chromosomes are used for the analysis of both genders, while the reads on the X and Y chromosomes are only used as a statistical reference for the same gender. In the next step, the PON is normalized by median per library size and per megabase for the whole genome, including X and Y chromosomes.

To improve the quality of the PON and to minimize technical artefacts, we identify the bins with a GC content that deviates from the expected value for the human genome. We determined the GC content of the reference genome using Bedtools v2.27.1 [4]. Bins with a GC-content less than the 0.275 percentile genome-wide assumed normal distribution were considered to be extreme and masked from the PON. Additionally, bins with the highest 1% variance genome-wide were masked from the PON.

A report for creating a panel of normals is then generated with the plots for sequencing depth of individual PON subjects, normalizing PON with a scaling factor equal to 2 (ploidy) for autosomes and equal to 1 for X and Y in male individuals and PON chromosomal overview with masking bins.

### Estimation of calculated karyotype and CNA

In the first step, the data of the tumor sample are normalized by the median sequencing depth per bin. Thereafter, we used standardization with calculation of the pseudo z-values of the distribution of the bins. Later they will be compared with the theoretical normal distribution.

$$\frac{x_i - 1}{\sigma_{(x)}} = Z_i,$$

where  $x_i$  represents the reads in the bin,  $\sigma_{(x)}$  is the standard deviation of the bin estimated from the PON,  $Z_i$  is the pseudo z-score of the bin.

In addition, we tested pseudo z-scores against a normal distribution with parameters of the PON in a two-tailed test. The obtained p-values were adjusted using the Benjamini-Hochberg method [5] in control the false discovery rate.

$$Z_i \sim N(\bar{z}_i^{PON}, \sigma_i^{PON})$$

where  $Z_i$  is the z-score of the bin in the sample derived from a normal distribution,  $N$ , with mean z-score and variance of this bin in the PON.

In consideration of the adjusted p-values, the deviating bins are calculated. A deletion in a bin is detected if the normalized value for that bin is below the median for all normalized PON samples with a significance level of  $\alpha = 0.05$ . An amplification leads to a value above the median.

For the estimation of the calculated karyotype, we used the genomic coordinates of the G-bands from the cytogenetic landmarks [6]. Since the G-bands are longer than one megabase we make sure that the start and end points of the bins overlap with the start and end positions of the bands as much as possible. We determined the start point of a bin that was as close as possible to the start position of a band. A bin with the closest possible to end point had to correspond the end point of a band. The masked bins were not included here. If half of all bins in a band have the status "deleted", that band is also considered deleted. The decision value of half of the bins also applies to the band amplification. All other bins are classified as non-aberrant.

To facilitate the interpretation of the report for CORIANDR users, we decided to group the bands together according to the ISCN nomenclature [7]. To merge the bands, we make sure whether they are on the same chromosome and contiguous and whether they have the same aberration status. Examining the coordinates for the G-bands we then define the loss or amplification of whole chromosome arms or whole chromosomes. If more than 80% of the G-bands of a chromosome arm or a whole chromosome show aberrations of the same type, we call it deleted or amplified.

Another feature of CORIANDR is the copy number alterations estimation of the individual genes. By examination the localization of the relevant genes in the aberrant bins, genetic mutations can be detected. The investigated genes are based on the list of the WHO classification of Acute Myeloid Leukemia [8] and the cancer driver genes [9]. If the positions of genes found in the aberrant bins, are also considered as aberrant in the report.

**Supplementary Table S1.**

Target regions of the VariantPlex Solid Tumor Panel (ArcherDx/Invitae)

| Gene   | Accession | Exon number                                   | SSVs | CNA |
|--------|-----------|-----------------------------------------------|------|-----|
| ABL1   | NM_005157 | 4,5,6,7                                       | yes  | yes |
| AKT1   | NM_005163 | 3,6                                           | yes  | no  |
| ALK    | NM_004304 | 21,22,23,25                                   | yes  | yes |
| APC    | NM_000038 | 16                                            | yes  | yes |
| ATM    | NM_000051 | 8,9,12,17,26,34,35,36,39,50,54,55,56,59,61,63 | yes  | yes |
| AURKA  | NM_003600 | 2,5,6,7,8                                     | yes  | yes |
| BRAF   | NM_004333 | 11,15                                         | yes  | no  |
| CCND1  | NM_053056 | na                                            | no   | yes |
| CCNE1  | NM_001238 | 3,4,5,6,7,8,10,12                             | yes  | yes |
| CDH1   | NM_004360 | 1,2,3,4,5,6,7,8,9,10,11,12,13,14,15,16        | yes  | yes |
| CDK4   | NM_000075 | 2,3,4,5,6,7                                   | yes  | yes |
| CDKN2A | NM_000077 | 1,2,3                                         | yes  | yes |
| CSF1R  | NM_005211 | 7,22                                          | yes  | no  |
| CTNNB1 | NM_001904 | 3                                             | yes  | no  |
| DDR2   | NM_006182 | 12,13,14,15,16,17,18                          | yes  | yes |
| EGFR   | NM_005228 | 3,7,15,18,19,20,21                            | yes  | yes |
| ERBB2  | NM_004448 | 10,19,20,21,24                                | yes  | yes |
| ERBB3  | NM_001982 | 2,3,7,8                                       | yes  | yes |
| ERBB4  | NM_005235 | 3,4,6,7,8,9,15,23                             | yes  | yes |
| ESR1   | NM_000125 | 8                                             | yes  | no  |
| EZH2   | NM_004456 | 16                                            | yes  | no  |
| FBXW7  | NM_018315 | 1,2,3,4,5,6,7,8,9,10,11                       | yes  | yes |
| FGFR1  | NM_015850 | 4,7,8,13,15,17                                | yes  | yes |
| FGFR2  | NM_000141 | 7,9,12,14                                     | yes  | yes |
| FGFR3  | NM_000142 | 7,8,9,14,15,16,18                             | yes  | yes |
| FLT3   | NM_004119 | 11,14,16,20                                   | yes  | yes |
| FOXL2  | NM_023067 | 1                                             | yes  | no  |
| GNA11  | NM_002067 | 5                                             | yes  | no  |
| GNAQ   | NM_002072 | 4,5                                           | yes  | no  |
| GNAS   | NM_000516 | 6,7,8,9                                       | yes  | yes |
| H3F3A  | NM_002107 | 2                                             | yes  | no  |
| HNF1A  | NM_000545 | 3,4                                           | yes  | no  |
| HRAS   | NM_005343 | 2,3                                           | yes  | no  |
| IDH1   | NM_005896 | 3,4                                           | yes  | no  |
| IDH2   | NM_002168 | 4                                             | yes  | no  |
| JAK2   | NM_004972 | 11,13,14,16,19                                | yes  | yes |
| JAK3   | NM_000215 | 4,13,16                                       | yes  | yes |
| KDR    | NM_002253 | 6,7,11,19,21,26,27,30                         | yes  | yes |

|         |           |                              |     |     |
|---------|-----------|------------------------------|-----|-----|
| KIT     | NM_000222 | 2,8,9,10,11,13,14,15,17,18   | yes | yes |
| KRAS    | NM_004985 | 2,3,4,5                      | yes | yes |
| MAP2K1  | NM_002755 | 2,3                          | yes | no  |
| MDM2    | NM_002392 | 2,3,4,6,8*,10                | no  | yes |
| MET     | NM_000245 | 2,11,14,16,19,21             | yes | yes |
| MYC     | NM_002467 | na                           | no  | yes |
| MYCN    | NM_005378 | na                           | no  | yes |
| MLH1    | NM_000249 | 12                           | yes | no  |
| MPL     | NM_005373 | 10                           | yes | no  |
| NOTCH1  | NM_017617 | 25,26,27,34                  | yes | yes |
| NPM1    | NM_002520 | 11                           | yes | no  |
| NRAS    | NM_002524 | 2,3,4,5                      | yes | yes |
| PDGFRA  | NM_006206 | 12,14,15,18,23               | yes | yes |
| PIK3CA  | NM_006218 | 2,5,7,8,10,14,19,21          | yes | yes |
| PIK3R1  | NM_181504 | 1,2,3,4,5,6,7,8,9,10         | yes | yes |
| PTEN    | NM_000314 | 1,2,3,4,5,6,7,8,9            | yes | yes |
| PTPN11  | NM_002834 | 3,13                         | yes | no  |
| RB1     | NM_000321 | 4,6,10,11,14,17,18,20,21,22* | yes | yes |
| RET     | NM_020630 | 10,11,13,14,15,16            | yes | yes |
| RHOA    | NM_001664 | 2,3                          | yes | no  |
| ROS1    | NM_002944 | 38                           | yes | no  |
| SMAD4   | NM_005359 | 2,3,4,5,6,7,8,9,10,11,12     | yes | yes |
| SMARCB1 | NM_003073 | 2,4,5,9                      | yes | yes |
| SMO     | NM_005631 | 3,5,6,9,11                   | yes | yes |
| SRC     | NM_005417 | 14                           | yes | no  |
| STK11   | NM_000455 | 1,2,3,4,5,6,7,8,9            | yes | yes |
| TERT    | NM_198253 | Promoter, 1                  | yes | no  |
| TP53    | NM_000546 | 1,2,3,4,5,6,7,8,9,10,11      | yes | yes |
| VHL     | NM_000551 | 1,2,3                        | yes | yes |

\*Red asterisk denotes partial coverage of that exon for SSVs

**Supplementary Table S2.**

Target genes of the FusionPlex Solid Tumor Panel (ArcherDx/Invitae)

| Gene     | Accession    | Exon                                 | Assay type | Direction |
|----------|--------------|--------------------------------------|------------|-----------|
| AKT3     | NM_005465    | 1, 2, 3                              | Fusion     | 5'        |
| ALK      | NM_004304    | 19, (intron 19), 20, 21, 22          | Fusion     | 5'        |
| ARHGAP26 | NM_015071    | 2, 10, 11, 12                        | Fusion     | 5'        |
| AXL      | NM_021913    | 19, 20                               | Fusion     | 3'        |
| BRAF     | NM_004333    | 7, 8, 9, 10, 11, 12                  | Fusion     | 5'        |
| BRAF     | NM_004333    | 7, 8                                 | Fusion     | 3'        |
| BRAF     | NM_004333    | V600Ei                               | Mutation   | N/A       |
| BRD3     | NM_007371    | 9, 10, 11, 12                        | Fusion     | 3'        |
| BRD4     | NM_014299    | 10, 11                               | Fusion     | 3'        |
| EGFR     | NM_005228    | 7, 9, 16, 20                         | Fusion     | 5'        |
| EGFR     | NM_005228    | 8 (2-7 exon skipping event)          | Fusion     | N/A       |
| EGFR     | NM_005228    | 24, 25                               | Fusion     | 3'        |
| ERG      | NM_004449    | 2, 3, 4, 5, 6, 7, 8, 9, 10, 11       | Fusion     | 5'        |
| ESR1     | NM_001122742 | 3, 4, 5, 6                           | Fusion     | 3'        |
| ETV1     | NM_004956    | 3, 4, 5, 6, 7, 8, 9, 10, 11, 12, 13  | Fusion     | 5'        |
| ETV4     | NM_001986    | 2, 4, 5, 6, 7, 8, 9, 10              | Fusion     | 5'        |
| ETV5     | NM_004454    | 2, 3, 7, 8, 9                        | Fusion     | 5'        |
| ETV6     | NM_001987    | 2, 3, 5, 6, 7                        | Fusion     | 5'        |
| ETV6     | NM_001987    | 1, 2, 3, 4, 5, 6                     | Fusion     | 3'        |
| EWSR1    | NM_005243    | 4, 5, 6, 7, 8, 9, 10, 11, 12, 13, 14 | Fusion     | 3'        |
| FGFR1    | NM_015850    | 2, 8, 9, 10                          | Fusion     | 5'        |
| FGFR1    | NM_015850    | 17                                   | Fusion     | 3'        |
| FGFR2    | NM_000141    | 2, 8, 9, 10                          | Fusion     | 5'        |
| FGFR2    | NM_000141    | 17                                   | Fusion     | 3'        |
| FGFR3    | NM_000142    | 8, 9, 10                             | Fusion     | 5'        |
| FGFR3    | NM_000142    | 17, Intron 17                        | Fusion     | 3'        |
| FGR      | NM_005248    | 2                                    | Fusion     | 5'        |
| INSR     | NM_000208    | 12, 13, 14, 15, 16, 17, 18, 19       | Fusion     | 5'        |

|        |              |                                               |          |     |
|--------|--------------|-----------------------------------------------|----------|-----|
| INSR   | NM_000208    | 20, 21, 22                                    | Fusion   | 3'  |
| MAML2  | NM_032427    | 2, 3                                          | Fusion   | 5'  |
| MAST1  | NM_014975    | 7, 8, 9, 18, 19, 20, 21                       | Fusion   | 5'  |
| MAST2  | NM_015112    | 2, 3, 5, 6                                    | Fusion   | 5'  |
| MET    | NM_000245    | 13, 15 (exon 14 skipping event)               | Fusion   | N/A |
| MET    | NM_000245    | 2, 13, 14, 16                                 | Fusion   | 5'  |
| MSMB   | NM_002443    | 2, 3, 4                                       | Fusion   | 3'  |
| MUSK   | NM_005592    | 7, 8, 9, 11, 12, 13, 14                       | Fusion   | 5'  |
| MYB    | NM_001130173 | 7, 8, 9, 11, 12, 13, 14, 15, 16               | Fusion   | 3'  |
| NOTCH1 | NM_017617    | 26, 27, 28, 29 (internal deletion exons 3-27) | Fusion   | 5'  |
| NOTCH1 | NM_017617    | 2, 4, 29, 30, 31                              | Fusion   | 3'  |
| NOTCH2 | NM_024408    | 26, 27, 28                                    | Fusion   | 5'  |
| NOTCH2 | NM_024408    | 5, 6, 7                                       | Fusion   | 3'  |
| NRG1   | NM_004495    | 1, 2, 3, 6                                    | Fusion   | 5'  |
| NTRK1  | NM_002529    | 8, 10, 11, 12, 13                             | Fusion   | 5'  |
| NTRK2  | NM_006180    | 11, 12, 13, 14, 15, 16, 17                    | Fusion   | 5'  |
| NTRK3  | NM_002530    | 13, 14, 15, 16                                | Fusion   | 5'  |
| NTRK3  | NM_001007156 | 15                                            | Fusion   | 5'  |
| NUMBL  | NM_004756    | 3                                             | Fusion   | 5'  |
| NUTM1  | NM_175741    | 3                                             | Fusion   | 5'  |
| PDGFRA | NM_006206    | 7 (exon 8 deletion)                           | Mutation | N/A |
| PDGFRA | NM_006206    | 10, 11, 12, 13, 14                            | Fusion   | 5'  |
| PDGFRA | NM_006206    | T674I, D842V                                  | Mutation | N/A |
| PDGFRB | NM_002609    | 8, 9, 10, 11, 12, 13, 14                      | Fusion   | 5'  |
| PIK3CA | NM_006218    | 2                                             | Fusion   | 5'  |
| PKN1   | NM_002741    | 10, 11, 12, 13                                | Fusion   | 5'  |
| PPARG  | NM_015869    | 1, 2, 3                                       | Fusion   | 5'  |
| PRKCA  | NM_002737    | 4, 5, 6                                       | Fusion   | 5'  |
| PRKCB  | NM_002738    | 3                                             | Fusion   | 5'  |
| RAF1   | NM_002880    | 4, 5, 6, 7, 9, 10, 11, 12                     | Fusion   | 5'  |

|         |              |                            |        |    |
|---------|--------------|----------------------------|--------|----|
| RAF1    | NM_002880    | 4, 5, 6, 7, 9              | Fusion | 3' |
| RELA    | NM_021975    | 3, 4                       | Fusion | 5' |
| RET     | NM_020630    | 8, 9, 10, 11, 12, 13       | Fusion | 5' |
| ROS1    | NM_002944    | 31, 32, 33, 34, 35, 36, 37 | Fusion | 5' |
| RSPO2   | NM_178565    | 1, 2                       | Fusion | 5' |
| RSPO3   | NM_032784    | 2                          | Fusion | 5' |
| TERT    | NM_198253    | 2                          | Fusion | 5' |
| TFE3    | NM_006521    | 2, 3, 4, 5, 6, 7, 8        | Fusion | 5' |
| TFE3    | NM_006521    | 2, 3, 4, 5, 6              | Fusion | 3' |
| TFEB    | NM_007162    | 1, 2                       | Fusion | 5' |
| THADA   | NM_022065    | 28                         | Fusion | 3' |
| TMPRSS2 | NM_001135099 | 1                          | Fusion | 3' |
| TMPRSS2 | NM_005656    | 1, 2, 3, 4, 5, 6           | Fusion | 3' |

**Supplementary Table S3.**

Target genes of the FusionPlex Pan Solid Tumor Panel (ArcherDx/Invitae)

| Gene     | Accession    | Exon                                                                            | Assay type                                                                            | Direction                                            |
|----------|--------------|---------------------------------------------------------------------------------|---------------------------------------------------------------------------------------|------------------------------------------------------|
| ACVR2A   | NM_001616    | 1, 2, 3                                                                         | Fusion                                                                                | 5'                                                   |
| AKT1     | NM_005163    | 2, 3, 4, 5, mid-exon5                                                           | Fusion                                                                                | 5'                                                   |
| AKT2     | NM_001626    | 2*, 5                                                                           | Fusion                                                                                | 5'                                                   |
| AKT2     | NM_001626    | 11                                                                              | Fusion                                                                                | 3'                                                   |
| AKT3     | NM_005465    | 2, 3, 4, 9                                                                      | Fusion                                                                                | 5'                                                   |
| AKT3     | NM_005465    | 6, 7, 8                                                                         | Fusion                                                                                | 3'                                                   |
| ALK      | NM_004304    | 2, 4, 6, 8, 10, 12,14, 16, 17, 18, 19, intron19, 20, mid-exon20, 21, 22, 23, 26 | Fusion, ALK ATl, Internal deletion (ALKΔ2-17, ALKΔ2-3)                                | 5'                                                   |
| ALK      | NM_004304    | 1, 2                                                                            | Internal deletion (ALKΔ2- 17, ALKΔ2-3)                                                | 3'                                                   |
| ALK      | NM_004304    | 22, 23, 25                                                                      | Mutation                                                                              | p.P1153- p.C1156, p.F1174, p.L1196- p.S1206, p.G1269 |
| AR       | NM_001011645 | 1                                                                               | Fusion                                                                                | 3'                                                   |
| AR       | NM_000044    | 1, 2, 3, 4, 5, 6, 7, 8*                                                         | Fusion, ARv7                                                                          | 3'                                                   |
| ARHGAP26 | NM_015071    | 2, 10, 11, 12                                                                   | Fusion                                                                                | 5'                                                   |
| ARHGAP6  | NM_006125    | 2                                                                               | Fusion                                                                                | 5'                                                   |
| AXL      | NM_021913    | 11                                                                              | Fusion                                                                                | 5'                                                   |
| AXL      | NM_021913    | 18, 19, mid-exon20, 20                                                          | Fusion                                                                                | 3'                                                   |
| BCOR     | NM_017745    | 8                                                                               | Fusion                                                                                | 5'                                                   |
| BCOR     | NM_001123385 | mid-exon2, 3, 4, mid-exon4, 5, 6, 7, 8, 9, 11, 15                               | Fusion, Internal Tandem Duplication                                                   | 5'                                                   |
| BCOR     | NM_001123385 | 2, 4, mid-exon4, 6, 7, mid-exon7, 10, 12, 14, 15                                | Fusion, Internal Tandem Duplication                                                   | 3'                                                   |
| BRAF     | NM_004333    | 2, 3, 4, 5, 7, 8, 9, 10, 11, 12, 15, 16                                         | Fusion, Kinase Domain Duplication, BRAFΔ2-10, BRAFΔ4-10, BRAFΔ2-8, BRAFΔ3-8, BRAFΔ4-8 | 5'                                                   |
| BRAF     | NM_004333    | 1, 2, 3, 7, 8, 10, 13, 14, 18                                                   | Fusion, Kinase Domain Duplication, BRAFΔ2-10, BRAFΔ4-10, BRAFΔ2-8, BRAFΔ3-8, BRAFΔ4-8 | 3'                                                   |
| BRAF     | NM_004333    | 15                                                                              | Mutation                                                                              | p.V600                                               |
| BRD3     | NM_007371    | 9, 10, 11, 12                                                                   | Fusion                                                                                | 3'                                                   |
| BRD4     | NM_058243    | 2*                                                                              | Fusion                                                                                | 5'                                                   |

|        |           |                                                       |                                                                            |                                                                      |
|--------|-----------|-------------------------------------------------------|----------------------------------------------------------------------------|----------------------------------------------------------------------|
| BRD4   | NM_058243 | 10, 11, 12, 13, 14                                    | Fusion                                                                     | 3'                                                                   |
| CAMTA1 | NM_015215 | 8, 9, mid-exon9, 10                                   | Fusion                                                                     | 5'                                                                   |
| CAMTA1 | NM_015215 | 3                                                     | Fusion                                                                     | 3'                                                                   |
| CCNB3  | NM_033031 | 2*, 3, 4, 5, 6,<br>mid-exon 6, 7                      | Fusion                                                                     | 5'                                                                   |
| CCND1  | NM_053056 | 1*, 2, 3, 4, 5                                        | Fusion                                                                     | 5'                                                                   |
| CCND1  | NM_053056 | 1, 2, 3, 4, mid-exon5*                                | Fusion                                                                     | 3'                                                                   |
| CCND1  | NM_053056 | 5*                                                    | Fusion                                                                     | 3'                                                                   |
| CCND1  | NM_053056 | 1                                                     | Mutation                                                                   | p.E36-p.C47                                                          |
| CD274  | NM_014143 | 7                                                     | Expression                                                                 | 5'                                                                   |
| CD274  | NM_014143 | 2, 3, 4, 5                                            | Expression                                                                 | 3'                                                                   |
| CIC    | NM_015125 | 12                                                    | Fusion                                                                     | 5'                                                                   |
| CIC    | NM_015125 | 14, 15, 16, 17, 18, mid-exon19,<br>19, mid-exon20,20* | Fusion                                                                     | 3'                                                                   |
| CRTC1  | NM_015321 | 1, 2, 3, 4                                            | Fusion                                                                     | 3'                                                                   |
| CSF1   | NM_000757 | 2, 3, 4, 5, 6                                         | Fusion                                                                     | 5'                                                                   |
| CSF1   | NM_000757 | 5, 6, 7, 8*, mid-exon9*                               | Fusion                                                                     | 3'                                                                   |
| CSF1   | NM_172212 | 9*                                                    | Fusion                                                                     | 3'                                                                   |
| CSF1R  | NM_005211 | 11, 12, 13                                            | Fusion                                                                     | 5'                                                                   |
| CTNNB1 | NM_001904 | 3                                                     | Mutation                                                                   | p.D32-p.S37                                                          |
| DNAJB1 | NM_006145 | 1, 2                                                  | Fusion                                                                     | 3'                                                                   |
| EGF    | NM_001963 | 16, 17, 18, 19                                        | Fusion                                                                     | 5'                                                                   |
| EGFR   | NM_005228 | 7, 8, 9, 14, 15, 16, 17, 18, 19,<br>20                | Fusion, Exon 2-7<br>Skipping<br>(EGFRvIII),Kinase<br>Domain<br>Duplication | 5'                                                                   |
| EGFR   | NM_005228 | 1, 24, 25, mid-exon25, 26                             | Fusion, Exon 2-7<br>Skipping<br>(EGFRvIII),Kinase<br>Domain<br>Duplication | 3'                                                                   |
| EGFR   | NM_005228 | 18, 19, 20, 21                                        | Mutation                                                                   | p.E709-p.G719,<br>p.E746-p.L760,<br>p.V774- p.G796,<br>p.L858-p.L861 |
| EPC1   | NM_025209 | 9, 10, 11                                             | Fusion                                                                     | 3'                                                                   |
| ERBB2  | NM_004448 | 4, 5, 13, 15, 17                                      | Fusion, Exon 16<br>skipping<br>(Δ16HER)                                    | 5'                                                                   |
| ERBB2  | NM_004448 | 15, 23, 24, 25, mid-exon26, 26                        | Fusion, Exon 16<br>skipping<br>(Δ16HER)                                    | 3'                                                                   |
| ERBB2  | NM_004448 | 8, 20                                                 | Mutation                                                                   | p.G309-p.S310,<br>p.Y772-p.P780,<br>p.C805                           |
| ERBB4  | NM_005235 | 2, 3, 4, 14, 15, 16, 17, 18, 23                       | Fusion                                                                     | 5'                                                                   |

|       |           |                                                         |                                   |                                                                             |
|-------|-----------|---------------------------------------------------------|-----------------------------------|-----------------------------------------------------------------------------|
| ERG   | NM_004449 | 2*, 3*, 4, 5, 6, 7, 8, 9, 10, 11                        | Fusion                            | 5'                                                                          |
| ESR1  | NM_000125 | 5, 6, 7, 8                                              | Fusion                            | 5'                                                                          |
| ESR1  | NM_000125 | 1, 2, 3, 4, 5, 6, 7                                     | Fusion                            | 3'                                                                          |
| ESRRA | NM_004451 | 2, 3                                                    | Fusion                            | 3'                                                                          |
| ETV1  | NM_004956 | 3, 4, 5, 6, 7, 8, 9, 10, 11, 12, 13                     | Fusion                            | 5'                                                                          |
| ETV4  | NM_001986 | 2, 3, 4, 5, 6, 7, 8, 9, 10                              | Fusion                            | 5'                                                                          |
| ETV5  | NM_004454 | 2*, 3, 7, 8, 9                                          | Fusion                            | 5'                                                                          |
| ETV6  | NM_001987 | 2, 3, 4, 5, 6, 7                                        | Fusion                            | 5'                                                                          |
| ETV6  | NM_001987 | 1, 2, 3, 4, 5, 6                                        | Fusion                            | 3'                                                                          |
| EWSR1 | NM_005243 | 8                                                       | Fusion                            | 5'                                                                          |
| EWSR1 | NM_005243 | 4, 5, 6, 7, 8, 9, 10, 11, 12, 13, 14                    | Fusion                            | 3'                                                                          |
| FGF1  | NM_00800  | mid-exon 2, 2                                           | Fusion                            | 5'                                                                          |
| FGFR1 | NM_015850 | 2*, 3, 4, 5, 6, 7, 8, 9, 10, 11, 17                     | Fusion, Kinase Domain Duplication | 5'                                                                          |
| FGFR1 | NM_015850 | 12, 17                                                  | Fusion, Kinase Domain Duplication | 3'                                                                          |
| FGFR1 | NM_023110 | 4, 13, 14                                               | Mutation                          | p.T141, p.V561, p.K656                                                      |
| FGFR2 | NM_000141 | 2*, 3, 5, 6, 7, 8, 9, 10                                | Fusion                            | 5'                                                                          |
| FGFR2 | NM_000141 | 16, 17, 18                                              | Fusion                            | 3'                                                                          |
| FGFR2 | NM_000141 | 7, 9, 12, 13, 14                                        | Mutation                          | p.S252- p.P253, p.G305, p.Y375-V395, p.I547- p.N549, p.V564, p.A648- p.K659 |
| FGFR3 | NM_000142 | 3, 5, 8, 9, 10, 11, 12, 13, 14                          | Fusion                            | 5'                                                                          |
| FGFR3 | NM_000142 | 16, 17, intron17, mid-exon18                            | Fusion                            | 3'                                                                          |
| FGFR3 | NM_000142 | 7, 9, 13, 14, 16                                        | Mutation                          | p.R248- p.S249, p.G370- p.R399, p.V555, p.D641- p.K650, p.G697- p.K715      |
| FGR   | NM_005248 | 2*, 3                                                   | Fusion                            | 5'                                                                          |
| FOS   | NM_005252 | mid-exon4                                               | Fusion                            | 3'                                                                          |
| FOSB  | NM_006732 | 1*, mid-exon1*, 1, 2                                    | Fusion                            | 5'                                                                          |
| FOXO1 | NM_002015 | 1*, 2, 3*                                               | Fusion                            | 5'                                                                          |
| FOXO1 | NM_002015 | 1*, 2*, 3*                                              | Fusion                            | 3'                                                                          |
| FOXO4 | NM_005938 | 2, mid-exon2, 3                                         | Fusion                            | 5'                                                                          |
| FOXR2 | -         | cryptic upstream exon2,3 (chrX:55562068, chrX:55634636) | Fusion                            | 5'                                                                          |
| FUS   | NM_004960 | 3, 4, 5, mid-exon6, 6, 7, 8, 9, 10, 11, 13, 14          | Fusion                            | 3'                                                                          |

|        |           |                                                           |                       |                                                                      |
|--------|-----------|-----------------------------------------------------------|-----------------------|----------------------------------------------------------------------|
| GLI1   | NM_005269 | 4, 5, 6, 7                                                | Fusion                | 5'                                                                   |
| GLI1   | NM_005269 | 4, 5, mid-exon5, 6, 7                                     | Fusion                | 3'                                                                   |
| GRB7   | NM_005310 | 10, 11, 12                                                | Fusion                | 5'                                                                   |
| HMGA2  | NM_003483 | 1, 2, 3, 4, mid-exon5*, 5*                                | Fusion                | 3'                                                                   |
| HRAS   | NM_005343 | 2, 3, 4                                                   | Mutation              | p.G12- p.G13,<br>p.Q61, p.K117,<br>p.A146                            |
| IDH1   | NM_005896 | 4                                                         | Mutation              | p.R132                                                               |
| IDH2   | NM_002168 | 4                                                         | Mutation              | p.R140,<br>p.R172                                                    |
| IGF1R  | NM_000875 | 13, 14, 15                                                | Fusion                | 5'                                                                   |
| INSR   | NM_000208 | 2, 12, 13, 14, 15, 16, 17, 18, 19                         | Fusion                | 5'                                                                   |
| INSR   | NM_000208 | 20, 21, 22                                                | Fusion                | 3'                                                                   |
| JAK2   | NM_004972 | 6, 7, 8, 9, 10, 11, 12, 13, 14,<br>15, 16, 17, 18, 19, 20 | Fusion                | 5'                                                                   |
| JAK2   | NM_004972 | 9, 10, 11, 12, 22                                         | Fusion                | 3'                                                                   |
| JAK2   | NM_004972 | 12, 14, 16, 19, 20                                        | Mutation              | p.F537-p.F547,<br>p.V617-p.C618,<br>p.L681-p.R683,<br>p.L855, p.V863 |
| JAK3   | NM_000215 | 10, 11, 12, 17, 18, 19                                    | Fusion                | 5'                                                                   |
| JAK3   | NM_000215 | 23                                                        | Fusion                | 3'                                                                   |
| JAK3   | NM_000215 | 11, 17                                                    | Mutation              | p.M511, p.S789                                                       |
| GLI1   | NM_005269 | 4, 5, 6, 7                                                | Fusion                | 5'                                                                   |
| GLI1   | NM_005269 | 4, 5, mid-exon5, 6, 7                                     | Fusion                | 3'                                                                   |
| GRB7   | NM_005310 | 10, 11, 12                                                | Fusion                | 5'                                                                   |
| JAZF1  | NM_175061 | 2, 3, 4                                                   | Fusion                | 3'                                                                   |
| KIT    | NM_000222 | 8                                                         | Fusion                | 5'                                                                   |
| KIT    | NM_000222 | 1                                                         | Fusion                | 3'                                                                   |
| KRAS   | NM_004985 | 2, 3, 4                                                   | Mutation              | p.G12- p.G13,<br>p.Q61, p.K117,<br>p.A146                            |
| MAML2  | NM_032427 | 2, 3                                                      | Fusion                | 5'                                                                   |
| MAML2  | NM_032427 | 2                                                         | Fusion                | 3'                                                                   |
| MAP2K1 | NM_002755 | 2                                                         | Fusion                | 5'                                                                   |
| MAP2K1 | NM_002755 | 2                                                         | Mutation              | p.F53-p.D67                                                          |
| MAST1  | NM_014975 | 7, 8, 9, 18, 19, 20, 21                                   | Fusion                | 5'                                                                   |
| MAST2  | NM_015112 | 2, 3, 5, 6                                                | Fusion                | 5'                                                                   |
| MAST2  | NM_015112 | 15, 16, 17                                                | Fusion                | 3'                                                                   |
| MBTD1  | NM_017643 | 3*                                                        | Fusion                | 5'                                                                   |
| MBTD1  | NM_017643 | 15, 16, 17                                                | Fusion                | 3'                                                                   |
| MDM2   | NM_002392 | 5, 9                                                      | Fusion,<br>Expression | 5'                                                                   |
| MDM2   | NM_002392 | 2, 4, 6, 8, 10                                            | Fusion,               | 3'                                                                   |

|        |              |                                          | Expression                                                                                                      |                                                  |
|--------|--------------|------------------------------------------|-----------------------------------------------------------------------------------------------------------------|--------------------------------------------------|
| MEAF6  | NM_001270875 | 4, 5                                     | Fusion                                                                                                          | 3'                                               |
| MET    | NM_000245    | 2, 4, 5, 6, 13, 14, 15, 16, 17, 21       | Fusion, Exon 14 Skipping (MET $\Delta$ ex14)                                                                    | 5'                                               |
| MET    | NM_000245    | 2, 13                                    | Fusion, Exon 14 Skipping (MET $\Delta$ ex14)                                                                    | 3'                                               |
| MGEA5  | NM_012215    | 4, 5, 6, 7, 8, 9, 12, 13, 14, 15         | Fusion, Expression                                                                                              | 5'                                               |
| MKL2   | NM_014048    | 11, 12, 13                               | Fusion                                                                                                          | 5'                                               |
| MN1    | NM_002430    | 1, 2                                     | Fusion                                                                                                          | 3'                                               |
| MSMB   | NM_002443    | 2, 3, 4                                  | Fusion                                                                                                          | 3'                                               |
| MUSK   | NM_005592    | 7, 9, 10, 12, 13, 14, 15                 | Fusion                                                                                                          | 5'                                               |
| MYB    | NM_001130173 | 7, 8, 9, 11, 12, 13, 14, 15, 16          | Fusion                                                                                                          | 3'                                               |
| MYBL1  | NM_001080416 | 8, 9, mid-exon10, 10, 11, 12, 13, 14, 15 | Fusion                                                                                                          | 3'                                               |
| MYC    | NM_002467    | 1, 2                                     | Expression                                                                                                      | 3'                                               |
| MYC    | NM_002467    | 1*, mid-exon1*, 2, 3                     | Fusion, Expression                                                                                              | 5'                                               |
| MYOD1  | NM_002478    | 1                                        | Mutation                                                                                                        | p.L122, full CDS coverage for mutation detection |
| NCOA1  | NM_147223    | 11, 12, 13, 14, 15                       | Fusion                                                                                                          | 5'                                               |
| NCOA2  | NM_006540    | 11, 12, 13, 14, intron14, 15, 16, 22     | Fusion                                                                                                          | 5'                                               |
| NCOA2  | NM_006540    | 14                                       | Fusion                                                                                                          | 3'                                               |
| NCOA3  | NM_006534    | 2*, 13, 14, 15, 16                       | Fusion                                                                                                          | 5'                                               |
| NCOA3  | NM_006534    | 20                                       | Fusion                                                                                                          | 3'                                               |
| NFATC2 | NM_012340    | 2, 3, 9, 10                              | Fusion                                                                                                          | 5'                                               |
| NFE2L2 | NM_006164    | 1, 2, 3, 4, 5                            | Exon skipping, Fusion                                                                                           | 5'                                               |
| NFIB   | NM_001369458 | 10, 11                                   | Fusion                                                                                                          | 5'                                               |
| NFIB   | NM_005596    | 9*, mid-exon 9                           | Fusion                                                                                                          | 5'                                               |
| NFIB   | NM_005596    | 2                                        | Fusion                                                                                                          | 3'                                               |
| NOTCH1 | NM_017617    | 2, 4, 24, 29, 30, 31                     | Fusion                                                                                                          | 3'                                               |
| NOTCH1 | NM_017617    | 5, 24, 25, 26, 27, 28, 29                | Fusion, Exon Skipping (NOTCH1 $\Delta$ 2-27, NOTCH1 $\Delta$ 21-27, NOTCH1 $\Delta$ 3-27, NOTCH1 $\Delta$ 3-28) | 5'                                               |
| NOTCH2 | NM_024408    | 24, 25, 26, 27, 28, 29                   | Fusion                                                                                                          | 5'                                               |
| NOTCH2 | NM_024408    | 5, 6, 7                                  | Fusion                                                                                                          | 3'                                               |
| NR4A3  | NM_173200    | 2*, 3*, 4, 5, 7, 9                       | Fusion, Expression                                                                                              | 5'                                               |
| NR4A3  | NM_173200    | 8                                        | Fusion, Expression                                                                                              | 3'                                               |

|        |              |                                                         |                       |                                                                                                               |
|--------|--------------|---------------------------------------------------------|-----------------------|---------------------------------------------------------------------------------------------------------------|
| NRAS   | NM_002524    | 2, 3, 4                                                 | Mutation              | p.G12-<br>p.G13,p.Q61,<br>p.K117, p.A146                                                                      |
| NRG1   | NM_001159996 | 1*, 3, 4, 5                                             | Fusion                | 5'                                                                                                            |
| NRG1   | NM_004495    | 1, 2, 3, 4, 5, 6                                        | Fusion                | 5'                                                                                                            |
| NRG1   | NM_013958    | 1*                                                      | Fusion                | 5'                                                                                                            |
| NRG1   | NM_013959    | 1*, 3                                                   | Fusion                | 5'                                                                                                            |
| NRG1   | NM_013962    | 1*                                                      | Fusion                | 5'                                                                                                            |
| NRG1   | NM_013962    | 1                                                       | Fusion                | 3'                                                                                                            |
| NTRK1  | NM_001007792 | 1, 2                                                    | Fusion                | 5'                                                                                                            |
| NTRK1  | NM_002529    | 1, 2, 3, 4, 5, 6, 7, 8, 9, 10, 11,<br>12, 13, 14        | Fusion                | 5'                                                                                                            |
| NTRK1  | NM_002529    | 13, 14, 15, 16, 17                                      | Mutation              | Full Kinase Domain<br>coverage for<br>resistance<br>mutations including<br>p.G595                             |
| NTRK2  | NM_006180    | 4, 5, 6, 7, 8, 9, 10, 11, 12, 13,<br>14, 15, 16, 17, 18 | Fusion                | 5'                                                                                                            |
| NTRK2  | NM_006180    | 11, 14                                                  | Fusion                | 3'                                                                                                            |
| NTRK2  | NM_006180    | 16, 17, 18, 19, 20, 21                                  | Mutation              | Full Kinase Domain<br>coverage for<br>resistance<br>mutations                                                 |
| NTRK3  | NM_001007156 | 15                                                      | Fusion                | 5'                                                                                                            |
| NTRK3  | NM_002530    | 3, 4, 5, 6, 7, 8, 9, 10, 11, 12,<br>13, 14, 15, 16      | Fusion                | 5'                                                                                                            |
| NTRK3  | NM_002530    | 13, 14, 15, 17                                          | Fusion                | 3'                                                                                                            |
| NTRK3  | NM_002530    | 15, 16, 17, 18, 19                                      | Mutation              | Full Kinase Domain<br>coverage for<br>resistance mutation<br>detection including<br>p.F617, p.G623,<br>p.G696 |
| NUMBL  | NM_004756    | 2, 3                                                    | Fusion                | 5'                                                                                                            |
| NUTM1  | NM_175741    | 2*, 3, mid-exon3, 4, 5, mid-<br>exon6, 6                | Fusion                | 5'                                                                                                            |
| PAX3   | NM_181459    | 2, 4, 8                                                 | Fusion,<br>Expression | 5'                                                                                                            |
| PAX3   | NM_181459    | 3, 5, 6, 7, 8                                           | Fusion,<br>Expression | 3'                                                                                                            |
| PAX8   | NM_003466    | 3                                                       | Fusion                | 5'                                                                                                            |
| PAX8   | NM_003466    | 1*, 2, 6, 7, 8, 9, 10                                   | Fusion                | 3'                                                                                                            |
| PDGFB  | NM_002608    | 2, 3                                                    | Fusion                | 5'                                                                                                            |
| PDGFD  | NM_025208    | 5, 6, 7                                                 | Fusion                | 5'                                                                                                            |
| PDGFRA | NM_006206    | 10, 11, 12, mid-exon12, 13, 14,<br>15                   | Fusion,PDGFRAΔ<br>8,9 | 5'                                                                                                            |
| PDGFRA | NM_006206    | 7                                                       | Fusion,PDGFRAΔ        | 3'                                                                                                            |

|        |              |                                               |          |                                                                                                             |
|--------|--------------|-----------------------------------------------|----------|-------------------------------------------------------------------------------------------------------------|
|        |              |                                               | 8,9      |                                                                                                             |
| PDGFRA | NM_006206    | 15, 18                                        | Mutation | p.T674, p.D842                                                                                              |
| PDGFRB | NM_002609    | 8, 9, 10, 11, 12, mid-exon12, 13, 14          | Fusion   | 5'                                                                                                          |
| PHF1   | NM_024165    | 1*, 2                                         | Fusion   | 5'                                                                                                          |
| PHF1   | NM_024165    | 10, 11, 12                                    | Fusion   | 3'                                                                                                          |
| PHKB   | NM_000293    | 4                                             | Fusion   | 3'                                                                                                          |
| PIK3CA | NM_006218    | 2, 15                                         | Fusion   | 5'                                                                                                          |
| PIK3CA | NM_006218    | 2, 3, 5, 6, 8, 10, 14, 21                     | Mutation | p.E81K-p.G118D, p.L339-p.D350, p.G364R, p.E418-p.C420, p.E453-p.K468, p.P539-p.Q546, p.E726,p.Y1021-p.T1052 |
| PKN1   | NM_002741    | 10, 11, 12, 13                                | Fusion   | 5'                                                                                                          |
| PLAG1  | NM_002655    | 1, 2, 3, 4                                    | Fusion   | 5'                                                                                                          |
| PPARG  | NM_015869    | 1, 2, 3                                       | Fusion   | 5'                                                                                                          |
| PRDM10 | NM_020228    | 13, 14                                        | Fusion   | 5'                                                                                                          |
| PRKACA | NM_002730    | 2                                             | Fusion   | 5'                                                                                                          |
| PRKACB | NM_182948    | 2, 3, 4                                       | Fusion   | 5'                                                                                                          |
| PRKCA  | NM_002737    | 4, 5, 6, 9, 15                                | Fusion   | 5'                                                                                                          |
| PRKCB  | NM_002738    | 1, 3, 7, 8, 9                                 | Fusion   | 5'                                                                                                          |
| PRKCD  | NM_006254    | 9, 10, 11, 12, 15                             | Fusion   | 5'                                                                                                          |
| PRKCD  | NM_006254    | 18                                            | Fusion   | 3'                                                                                                          |
| PRKD1  | NM_002742    | 2, 10, 11, 12, 13                             | Fusion   | 5'                                                                                                          |
| PRKD2  | NM_016457    | 10, 11, 12, 13                                | Fusion   | 5'                                                                                                          |
| PRKD3  | NM_005813    | 10, 11, 12, 13                                | Fusion   | 5'                                                                                                          |
| RAD51B | NM_133509    | 8                                             | Fusion   | 5'                                                                                                          |
| RAD51B | NM_133509    | 3, 4, 5, 6, 7, 8, 9                           | Fusion   | 3'                                                                                                          |
| RAF1   | NM_002880    | 2*, 4, 5, 6, 7, 8, 9, 10, 11, 12              | Fusion   | 5'                                                                                                          |
| RAF1   | NM_002880    | 4, 5, 6, 7, 8, 9                              | Fusion   | 3'                                                                                                          |
| RELA   | NM_021975    | 1, 2, 3, 4, 11                                | Fusion   | 5'                                                                                                          |
| RET    | NM_020630    | 2, 4, 6, 8, 9, 10, 11, mid-exon11, 12, 13, 14 | Fusion   | 5'                                                                                                          |
| RET    | NM_020630    | 15, 16                                        | Mutation | p.A883, p.M918                                                                                              |
| ROS1   | NM_002944    | 2, 4, 7, 31, 32,33, 34, 35, 36, 37            | Fusion   | 5'                                                                                                          |
| ROS1   | NM_002944    | 38                                            | Mutation | p.G2032                                                                                                     |
| RSPO2  | NM_178565    | 1, 2*, 3*                                     | Fusion   | 5'                                                                                                          |
| RSPO3  | NM_032784    | 2                                             | Fusion   | 5'                                                                                                          |
| SS18   | NM_001007559 | 2, 3, 4, 5, 6, 10, 11                         | Fusion   | 5'                                                                                                          |
| SS18   | NM_001007559 | 4, 5, 6, 8, 9, 10                             | Fusion   | 3'                                                                                                          |
| SS18L1 | NM_198935    | 1, 2, 3, 8, 9, 10                             | Fusion   | 3'                                                                                                          |

|         |              |                                                   |                    |    |
|---------|--------------|---------------------------------------------------|--------------------|----|
| STAT6   | NM_001178078 | 1*, 2*, 3, 4, 5, 6, 7, 15, 16, 17, 18, 19, 20     | Fusion             | 5' |
| TAF15   | NM_139215    | 6, 7                                              | Fusion             | 5' |
| TAF15   | NM_139215    | 5, 6, 7, 9                                        | Fusion             | 3' |
| TCF12   | NM_207036    | 4, 5, 6                                           | Fusion             | 3' |
| TERT    | NM_198253    | 2, 3, 5, 7, 10, 11, 12                            | Fusion, Expression | 5' |
| TERT    | NM_198253    | 3, 9, 15                                          | Fusion, Expression | 3' |
| TFE3    | NM_006521    | 2, 3, 4, 5, 6, 7, 8                               | Fusion             | 5' |
| TFE3    | NM_006521    | 2, 3, 4, 5, 6                                     | Fusion             | 3' |
| TFEB    | NM_007162    | 1*, 2*, 3, mid-exon3, 4, mid-exon4, mid-exon 5, 6 | Fusion             | 5' |
| TFEB    | NM_007162    | 9, mid-exon 10                                    | Fusion             | 3' |
| TFG     | NM_006070    | 6                                                 | Fusion             | 5' |
| TFG     | NM_006070    | 3, 4, 5, 6, 7, mid-exon8                          | Fusion             | 3' |
| THADA   | NM_022065    | 24, 25, 26, 27, 28, 29, 30, 31, 36, 37            | Fusion             | 3' |
| TMPRSS2 | NM_001135099 | 1                                                 | Fusion             | 3' |
| TMPRSS2 | NM_005656    | 1*, 2, 3, 4, 5, 6                                 | Fusion             | 3' |
| USP6    | NM_004505    | 1*, mid-exon1*, 2*, 3                             | Fusion             | 5' |
| VGLL2   | NM_182645    | 1, 2, 3, intron3, 4                               | Fusion             | 3' |
| WWTR1   | NM_015472    | 3, 4                                              | Fusion             | 5' |
| WWTR1   | NM_015472    | 3, 4                                              | Fusion             | 3' |
| YAP1    | NM_001130145 | 1, mid-exon1, 2, 3, 4, 8, 9                       | Fusion             | 5' |
| YAP1    | NM_001130145 | 1, 2, 3, 4, 5, 6, 7                               | Fusion             | 3' |
| YWHAE   | NM_006761    | 5                                                 | Fusion             | 3' |

\*Indicates exons that are entirely untranslated region (UTR), or for which the UTR is targeted.

\*\*The mutations listed are targeted by the assay design. Version 6.3 and earlier of Archer Analysis may not support RNA SNV/InDel variant calling at exon junctions depending on the sequence context (SNVs ≤5bp, Indels ≤30bp). RNA SNV/InDel mutation detection is not supported on the Ion Torrent Sequencing Platform

† ALK-AT1 currently requires review outside of Archer Analysis

**Supplementary Figure S1**

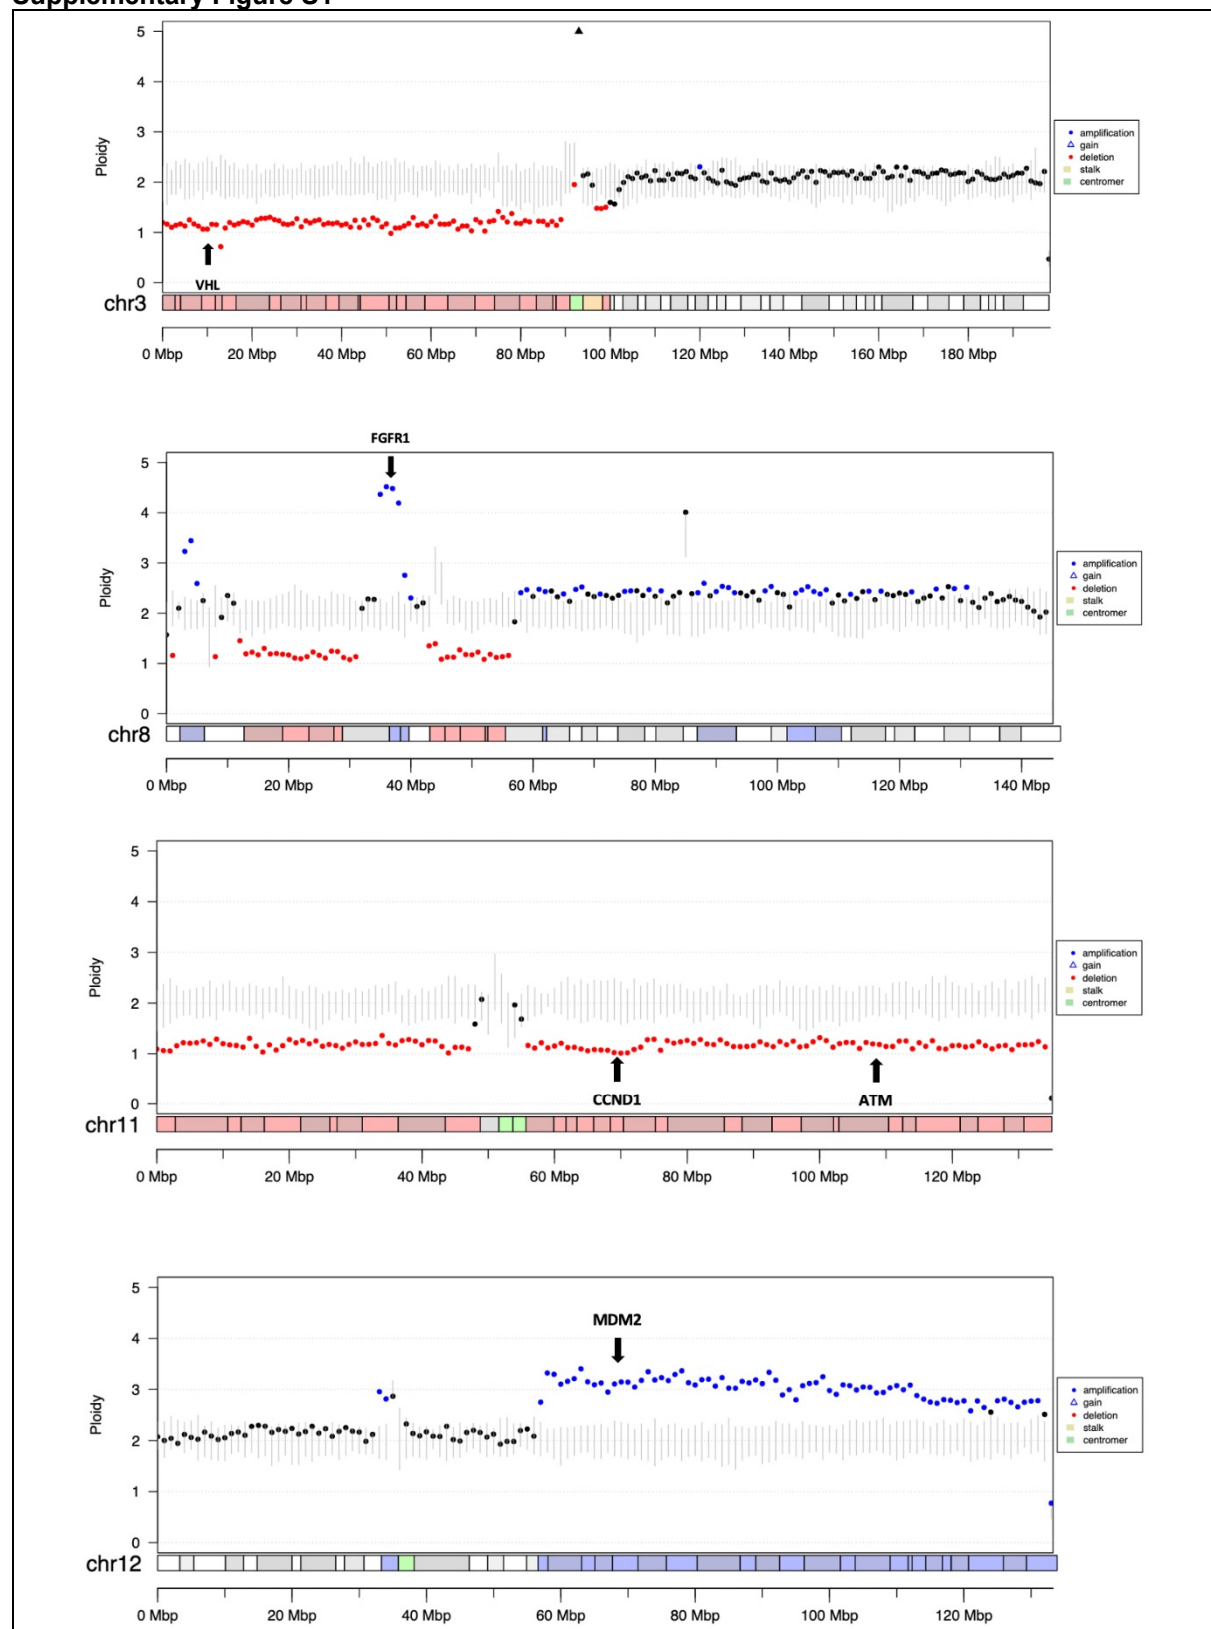

**Supplementary Figure S1. Chromosome (Chr.) plots generated by CORIANDR for Chr. 3, 8, 11, 12 of a patient with sarcoma.** In addition to the CNAs underlined in the Manuscript (Figure 2), ulcWGS uncovered partial losses in Chr. 3 (del(p)), Chr. 8 (del(p22p21.1), add(p11.23p11.22)x2, del(p11.1q11.23), Chr. 11 (-11) and Chr. 12 (add(q13.3q24.33)). These alterations are compatible with low-level copy number (CN) gains and losses also reported by the VP panel: VHL (CN: 0,54), FGFR1 (CN: 2,28), CCND1 (CN: 0,59), ATM (CN: 0,55), MDM2 (CN: 1,45).

Supplementary figure S2

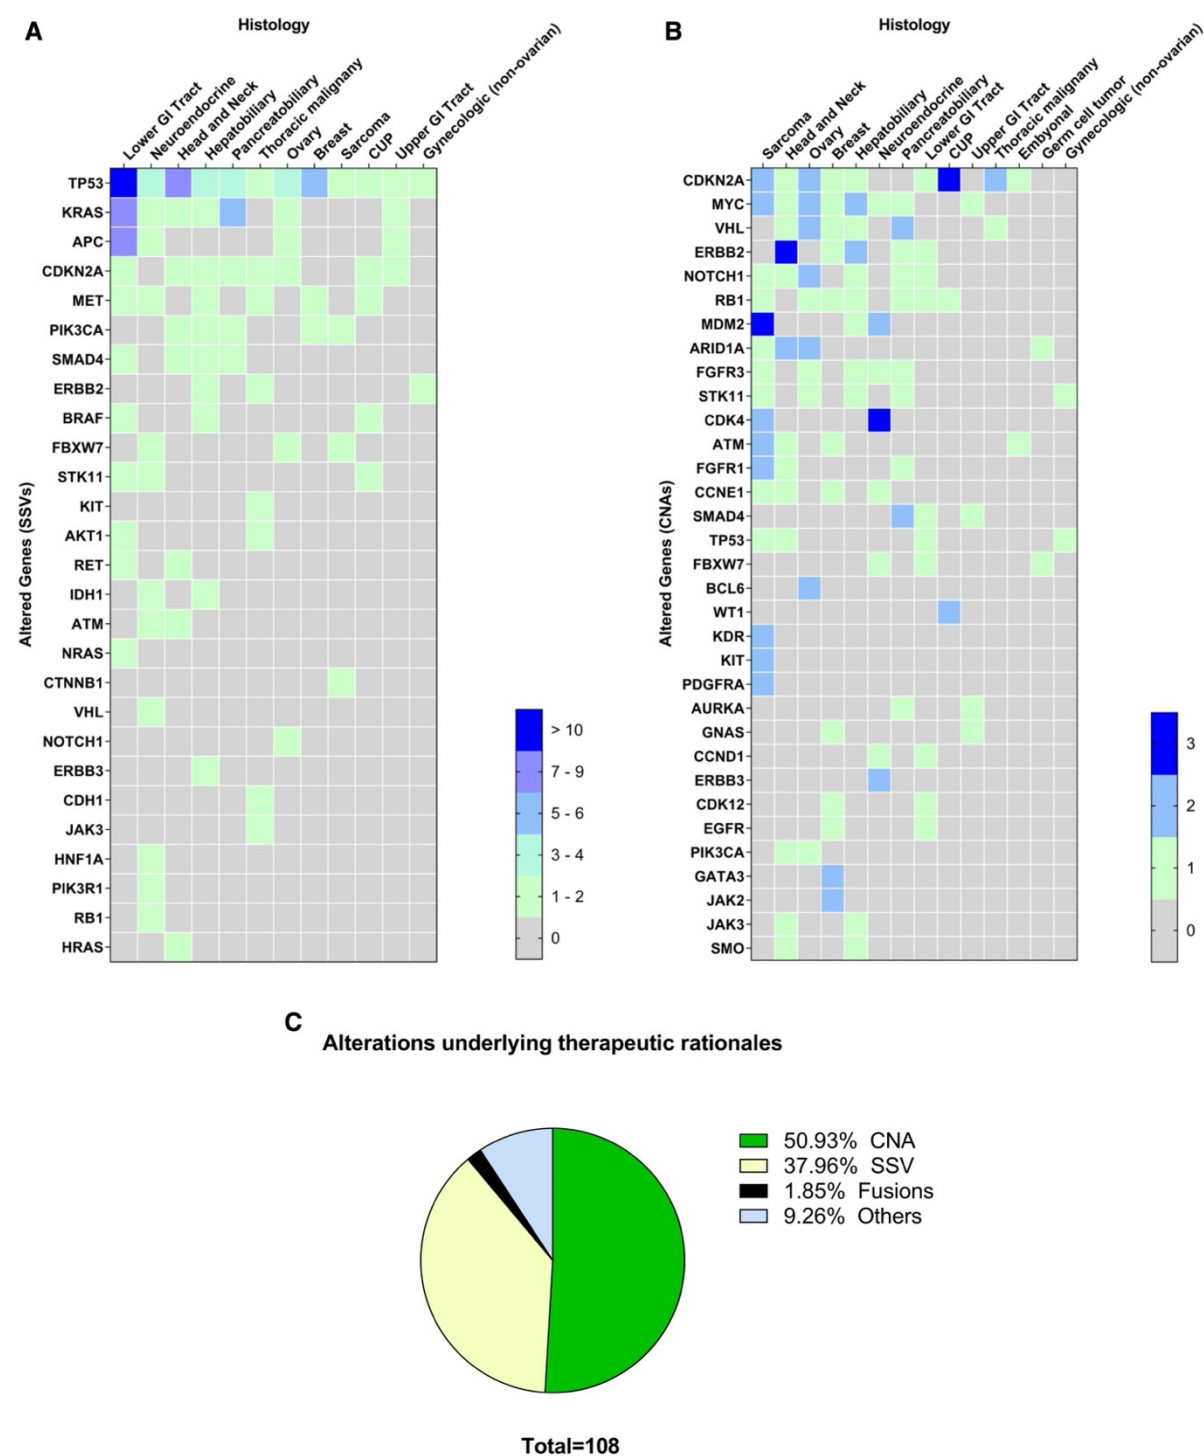

Supplementary Figure S2. Distribution of genetic alterations across cancer types and therapeutic suggestions. (A) Distribution of SSVs across different tumor groups. (B) Distribution of CNAs across different tumor groups. (C) Alterations determining therapeutic suggestions in the MTB cohort.

Supplementary Figure S3

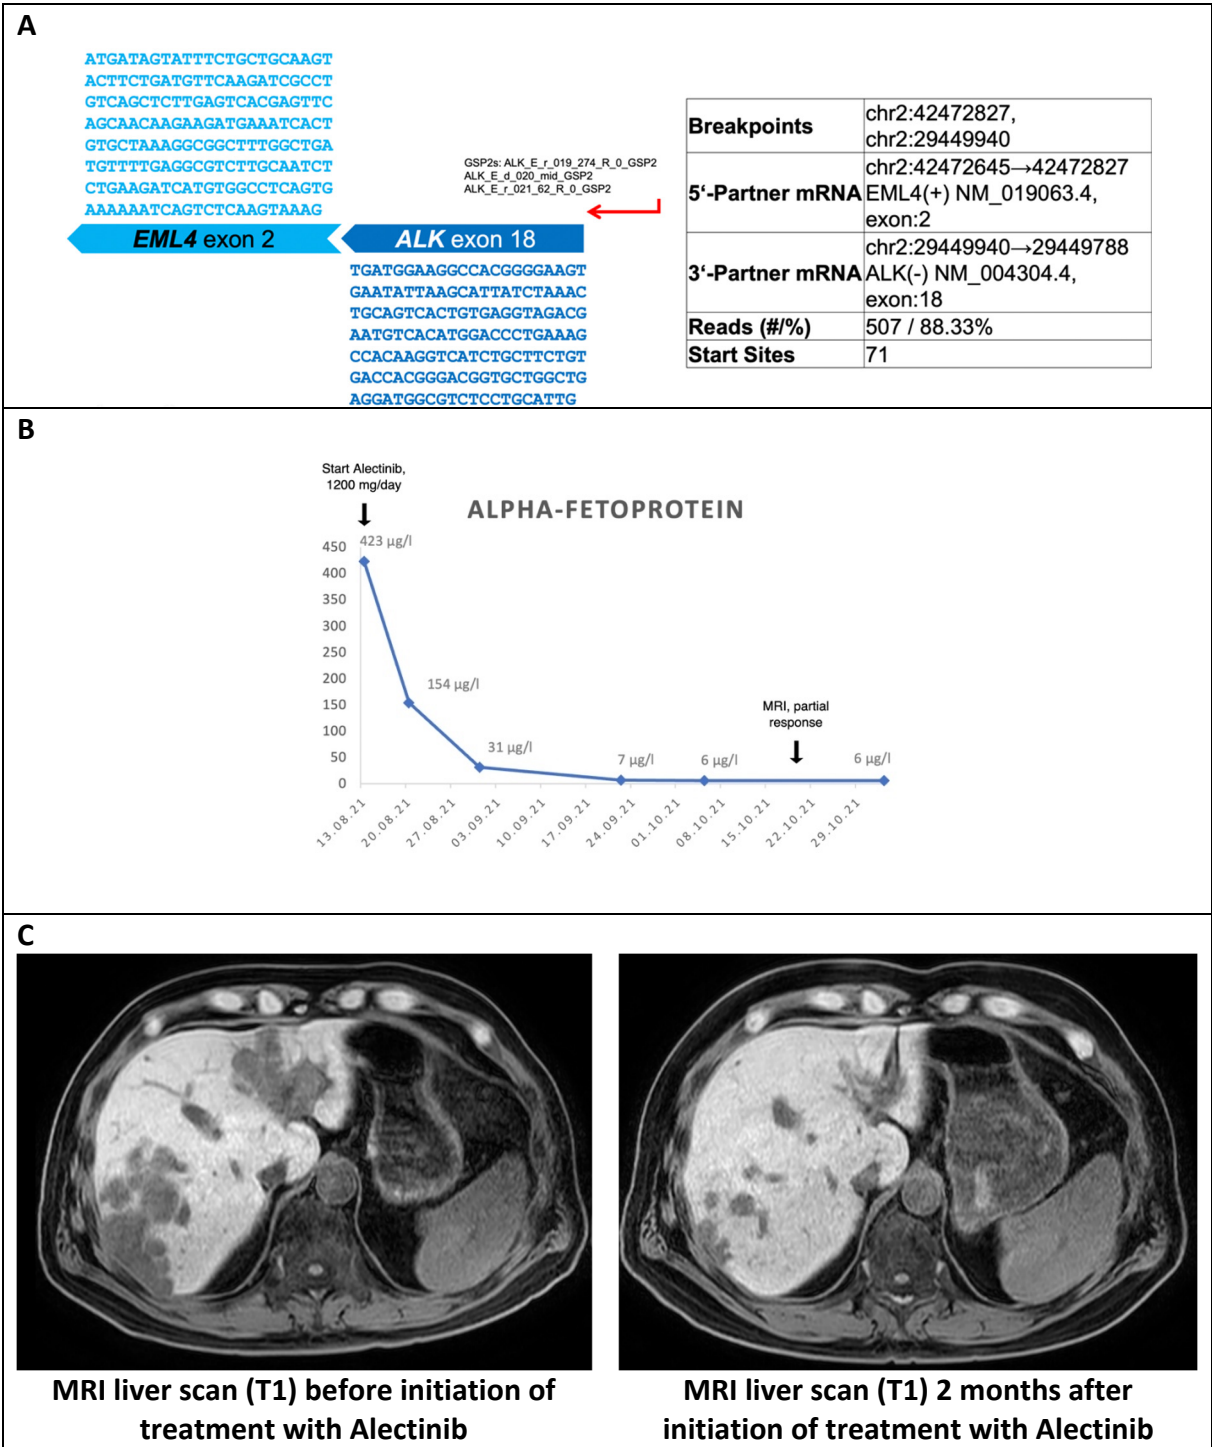

**Supplementary Figure S3: A non-canonical *EML4*-*ALK* fusion in a patient with pancreatic cancer.** We report the first case, to our knowledge, of a non-canonical *EML4*-*ALK* translocation that originated from breakpoints of *EML4* exon 2 and *ALK* exon 18 (Figure S2A) detected in a patient with metastatic pancreatic adenocarcinoma. Since another case of non-canonical *EML4*-*ALK* with *ALK* exon 18 has been reported to be refractory to crizotinib [10], a second generation *ALK* inhibitor (Alectinib) was started at the standard dose of 600 mg twice daily. The patient immediately showed clinical response, decrease of tumor marker values (Alpha-Fetoprotein) (Figure S2B) and partial remission in magnetic resonance imaging (MRI) (Figure S2C).

## Supplementary Table S4

### Patients with major clinical benefit following MTB recommended therapy

| Diagnosis                | Therapeutic rationale                                                             | MTB recommendation                    | EL ESCAT   | EL DTKK  | Label | PFS2 | PFS1 | PFSr | Outcome                                        |
|--------------------------|-----------------------------------------------------------------------------------|---------------------------------------|------------|----------|-------|------|------|------|------------------------------------------------|
| CUP                      | <i>TMPRSS2-ERG</i> Fusion (changed diagnosis from CUP to prostate cancer)         | Docetaxel + ADT                       | n/a        | n/a      | On    | 6    | 3.5  | 1.7  | SD for 6 months                                |
| Acinic cell carcinoma    | <i>ATM</i> del                                                                    | Niraparib + Carboplatin               | III-B [11] | m4       | Off   | 12   | n/a  | n/a  | SD for 12 months                               |
| CUP                      | <i>SEC31A-ALK</i> Fusion (changed diagnosis from CUP to CD20-negative ALK+ DLBCL) | Chemotherapy (CHOEP)                  | n/a        | n/a      | On    | 23.5 | 10.5 | 2.2  | CR, ongoing at almost 2 year follow-up         |
| CRC                      | <i>BRAF</i> V600E                                                                 | Encorafenib + Binimetinib + Cetuximab | I-A [12]   | m1a      | Off   | 7.5  | 3    | 2.5  | SD for 7.5 months                              |
| Sinonasal adenocarcinoma | <i>ARID1A</i> deletion                                                            | Pembrolizumab                         | III-A [13] | m2b      | Off   | 12   | n/a  | n/a  | SD for 12 months                               |
| Steroid cell tumor       | <i>RET</i> Y791F                                                                  | Cabozantinib                          | IV-A [14]  | m3       | Off   | 9.5  | 1    | 9.5  | Decrease of Tumor marker and SD for 9.5 months |
| CUP                      | <i>BRAF</i> V600E                                                                 | Encorafenib + Binimetinib             | III-A [15] | m2a      | Off   | 18.5 | 3    | 6.2  | PR and SD for 18 months                        |
| TNBC                     | <i>EGFR</i> amplification                                                         | Cetuximab + Capecitabine              | IV-A [16]  | m1c [17] | Off   | 9.25 | 2    | 4.6  | SD for 9.25 months                             |
| Sarcoma                  | <i>KDR, KIT, PDGFRA</i> Amplification                                             | Pazopanib                             | IV-A [18]  | m3       | On    | 6.25 | 14   | 0.4  | SD for 6.25 months                             |
| Pancreatic cancer        | <i>EML4-ALK</i> Fusion                                                            | Alectinib monotherapy                 | III-B [19] | m4       | Off   | 7.7  | 1    | 7.7  | PR and SD for 7.7 months                       |

## Supplementary Table S5. Genetic alterations in *n*=104 patients referred to the MTB.

See separate *xlsx*-file

## Supplementary References

1. Langmead B, Salzberg SL. Fast gapped-read alignment with Bowtie 2. *Nature Methods*. 2012 Apr;9(4):357–9.
2. Li H. A statistical framework for SNP calling, mutation discovery, association mapping and population genetical parameter estimation from sequencing data. *Bioinformatics*. 2011 Nov;27(21):2987–93.
3. Liao Y, Smyth GK, Shi W. FeatureCounts: An efficient general purpose program for assigning sequence reads to genomic features. *Bioinformatics*. 2014 Apr 1;30(7):923–30.
4. Quinlan AR. BEDTools: The Swiss-Army tool for genome feature analysis. *Current Protocols in Bioinformatics*. 2014;2014:11.12.1–11.12.34.
5. Benjamini Y, Hochberg Y. Controlling the False Discovery Rate: a Practical and Powerful Approach to Multiple Testing. Vol. 57, *J. R. Statist. Soc. B*. 1995.
6. Cheung et al. Integration of cytogenetic landmarks into the draft sequence of the human genome. *Nature*. 2001;953–8.
7. An International System for Human Cytogenomic Nomenclature [Internet]. 2020. Available from: <https://www.karger.com/Book/Home/279152>
8. Papaemmanuil E, Gerstung M, Bullinger L, Gaidzik VI, Paschka P, Roberts ND, et al. Genomic Classification and Prognosis in Acute Myeloid Leukemia. *New England Journal of Medicine*. 2016 Jun 9;374(23):2209–21.
9. Bailey MH, Tokheim C, Porta-Pardo E, Sengupta S, Bertrand D, Weerasinghe A, et al. Comprehensive Characterization of Cancer Driver Genes and Mutations. *Cell*. 2018 Apr 5;173(2):371–385.e18.
10. Anai S, Takeshita M, Ando N, Ikematsu Y, Mishima S, Ishida K, et al. A case of lung adenocarcinoma resistant to crizotinib harboring a novel EML4-ALK variant, exon 6 of EML4 fused to exon 18 of ALK. Vol. 11, *Journal of Thoracic Oncology*. Lippincott Williams and Wilkins; 2016. p. e126–8.
11. Mateo J, Carreira S, Sandhu S, Miranda S, Mossop H, Perez-Lopez R, et al. DNA-Repair Defects and Olaparib in Metastatic Prostate Cancer. *N Engl J Med*. 2015 Oct 29;373(18):1697–708.
12. Kopetz S, Grothey A, Yaeger R, van Cutsem E, Desai J, Yoshino T, et al. Encorafenib, Binimetinib, and Cetuximab in BRAF V600E–Mutated Colorectal Cancer . *New England Journal of Medicine*. 2019 Oct 24;381(17):1632–43.
13. Okamura R, Kato S, Lee S, Jimenez RE, Sicklick JK, Kurzrock R. ARID1A alterations function as a biomarker for longer progression-free survival after anti-PD-1/PD-L1 immunotherapy. *J Immunother Cancer*. 2020;8(1).
14. Bentzien F, Zuzow M, Heald N, Gibson A, Shi Y, Goon L, et al. In vitro and in vivo activity of cabozantinib (XL184), an inhibitor of RET, MET, and VEGFR2, in a model of medullary thyroid cancer. *Thyroid*. 2013 Dec 1;23(12):1569–77.
15. Dummer R, Ascierto PA, Gogas HJ, Arance A, Mandala M, Liszkay G, et al. Encorafenib plus binimetinib versus vemurafenib or encorafenib in patients with BRAF -mutant melanoma (COLUMBUS): a multicentre, open-label, randomised phase 3 trial. *The Lancet Oncology*. 2018 May;19(5):603–15.
16. Zhu H, Wang C, Wang J, Chen D, Deng J, Deng J, et al. A subset of esophageal squamous cell carcinoma patient-derived xenografts respond to cetuximab, which is predicted by high EGFR expression and amplification. *Journal of Thoracic Disease*. 2018 Sep;10(9):5328–38.
17. Sabatier R, Lopez M, Guille A, Billon E, Carbuccia N, Garnier S, et al. High Response to Cetuximab in a Patient With *EGFR* -Amplified Heavily Pretreated Metastatic Triple-Negative Breast Cancer. *JCO Precision Oncology*. 2019 Dec;(3):1–8.

18. Kiyuna T, Murakami T, Tome Y, Igarashi K, Kawaguchi K, Miyake K, et al. Doxorubicin-resistant pleomorphic liposarcoma with PDGFRA gene amplification is targeted and regressed by pazopanib in a patient-derived orthotopic xenograft mouse model. *Tissue & cell*. 2018 Aug;53:30–6.
19. Camidge DR, Dziadziuszko R, Peters S, Mok T, Noe J, Nowicka M, et al. Updated Efficacy and Safety Data and Impact of the EML4-ALK Fusion Variant on the Efficacy of Alectinib in Untreated ALK-Positive Advanced Non-Small Cell Lung Cancer in the Global Phase III ALEX Study. *Journal of Thoracic Oncology*. 2019 Jul 1;14(7):1233–43.
