# Supplementary material for: Combined Focused Next-Generation Sequencing Assays to Guide Precision Oncology in Solid Tumors: A Retrospective Analysis from an Institutional Molecular Tumor Board
Source: Cancers (Basel). 2022 Sep 12;14(18):4430. doi: 10.3390/cancers14184430 (PMC9496918; doi:10.3390/cancers14184430)
Supplement: Supplementary file 1 [file cancers-14-04430-s001.zip › Tarawneh et al_Supplementary Table S5.xlsx]

## Sheet: Alterations
Pseudonym	Disease Group	OncoTree	OncoTree special	Gene	Alterartion	SSV Variant
1	Lower GI Tract	COADREAD	COAD	TP53	SSV	R175H
				KRAS	SSV	G12D
				SMAD4	SSV	C499R
2	Ovary	OVT	HGSOC	TP53	SSV	C275G
				MYC	amp
				ARID1A	del
				BCL6	amp
				CDKN2A	del
3	Sarcoma	CHS	CHS	FBXW7	SSV	R465H
				TP53	SSV	c.672+1G>A
4	Thoracic malignany	NSCLC	LUAD	ERBB2	SSV	G778_P789dup
5	CUP	CUP	CUP	STK11	SSV	E14Q
				WT1	amp
6	Thoracic malignany	TET	THYC	TP53	SSV	R248Q
				KIT	SSV	V560del
7	Lower GI Tract	COADREAD	COAD	APC	SSV	E1397*
				NRAS	SSV	G13R
				TP53	SSV	R175H
8	CUP	CUP/PRAD	CUP/PRAD	TP53	SSV	R175H
				RB1	del
				TMPRSS2-ERG	Fusion
9	Embyonal	NBL	NBL	CDKN2A	del
				ATM	del
10	Head and Neck	SACA	ACCC	ARID1A	del
				ATM	del
11	Hepatobiliary	CHOL	EHCH	n/a
12	Lower GI Tract	COADREAD	COAD	APC	SSV	Q1378*
				TP53	SSV	M246V
				FBXW7	del
13	Ovary	OOVC	n/a	FGFR3	amp
				NOTCH1	amp
				STK11	amp
				VHL	amp
14	Lower GI Tract	APAD	MAAP	KRAS	SSV	G12V
				TP53	SSV	V173M
				NOTCH1	amp
				TP53	del
15	Germ cell tumor	OGCT	OYST	MYCN	amp
				ARID1A	del
				FBXW7	del
16	CUP	CUP/LNM	CUP/ALKLBCL	SECR1A-ALK	Fusion
				WT1	amp
17	Lower GI Tract	COADREAD	READ	AKT1	SSV	E17K
				APC	SSV	R1450*
				KRAS	SSV	A146T
				TP53	SSV	R273H
18	Sarcoma	SYNS	SYNS	KDR	amp
				KIT	amp
				PDGFRA	amp
				ARID1A	del
				FGFR1	amp
				ATM	del
				MDM2	amp
19	Lower GI Tract	COADREAD	MACR	BRAF	SSV	V600E
				RB1	del
20	Thoracic malignany	TET	THYC	KIT	SSV	Y553_Q556del	KIT
				CDKN2A	del
				IRF6	amp
				VHL	del
21	Sarcoma	MFH	MFH	FGFR3	amp
				PTEN	del
				RB1	del
				STK11	amp
				NOTCH1	amp
				CDH genes	amp
22	Upper GI Tract	ECG	GEJ	TP53	SSV	R248Q
				MYC	amp
23	CUP	CUP	CUP	CDKN2A	SSV	R80*
				CDKN2A	del
24	Ovary	OVT	HGSOC?	FBXW7	SSV	R479Q
				KRAS	SSV	G12C
				NOTCH1	amp
				VHL	del
25	Head and Neck	OHNCA	SNA	SMAD4	SSV	A532D
				TP53	SSV	G245A
				SMARCB1	del
				ERBB2	del
				FGFR1	amp
				JAK3	del
				NOTCH1	amp
				SMO	del
				TP53	del
				VHL	amp
				ARID1A	del
26	Head and Neck	SCST	SCT	RET	SSV	Y791F
27	Upper GI Tract	ECG	GEJ	AURKA	amp
				KRAS	amp
				SMAD4	del
				GNAS	amp
				GATA5	amp
				NFATC1	del
28	Sarcoma	CHS	CHS	CTNNB1	SSV	S45F
				PIK3CA	SSV	E545K
				MYC	amp
29	Neuroendocrina	TNET	TNET	n/a
30	CUP	CUP	CUP	BRAF	SSV	V600E
				MET	SSV	N375S
31	Neuroendocrina	GINET	SBWDNET	KRAS	SSV	G13D
32	Breast	BRCA	IDC	TP53	SSV	R248W
				GNAS	amp
				PARP6	amp
				PARP16	amp
				ATM	del
				TXNL1	amp
33	Neuroendocrina	CUP	NETNOS	MYC	amp
34	Head and Neck	OHNCA	OHNCA	TP53	SSV	P190L
				CDKN2A	del
				MYB-NFIB	Fusion
35	Hepatobiliary	GBC	GBAD	KRAS	SSV	G12V
				MDMD	amp
				ERBB2	del
				FGFR3	amp
				JAK3	del
				NOTCH1	amp
				SMO	del
				STK11	amp
				VHL	amp
36	Head and Neck	OHNCA	SNA	KRAS	SSV	G12V
				TP53	SSV	Ile255del
				MAPK3	amp
37	Pancreatobiliary	AMPCA	AMPCA	KRAS	SSV	G12D
				ERBB2	amp
				VHL	amp
				SMURF	amp
38	Head and Neck	SAAD	SAAD	n/a
39	Breast	BRCA	BRCNOS	TP53	SSV	E285K
40	Gynecologic (non-ovarian)	CEAD	CEAD	n/a
41	Sarcoma	SARCNOS	SARCNOS	TP53	SSV	R196*
				KIT	amp
				KDR	amp
				PDGFRA	amp
				CCNE1	amp
42	Lower GI Tract	COREAD	READ	BRAF	SSV	D594G
				CDKN2A	SSV	R80*
				TP53	SSV	K292*
43	Pancreatobiliary	AMPCA	AMPCA	KRAS	SSV	G12D
				PIK3CA	SSV	E545K
				TP53	SSV	R273H
				AURKA	amp
				FGFR1	del
				FGFR3	amp
				NOTCH1	amp
				RB1	amp
				SMAD4	amp
				STK11	amp
				VHL	amp
44	Head and Neck	n/a	n/a	CDKN2A	SSV	R80*
				PIK3CA	SSV	E545K
				TP53	SSV	C135F
45	Neuroendocrina	PANET	PANET	IDH1	SSV	R132C
				VHL	SSV	L89H
46	Neuroendocrina	PANET	PANET	CCND1	amp
				CDK4	amp
				ERBB3	amp
47	Breast	BRCA	BRCANOS	PIK3CA	SSV	H1047R
				TP53	SSV	R196*
				ERBB2	amp
				VHL	amp
				CDK12	amp
48	Sarcoma	LIPO	MRLS	CDK4	amp
				MDM2	amp
				MYC	amp
				ROS1	amp
49	CUP	CUP	ADNOS	CDKN2A	del
50	Upper GI Tract	SBC	DA	APC	SSV	E1547*
				CDKN2A	SSV	R107H
				KRAS	SSV	G12D
51	Hepatobiliary	HCC	HCC	MYC	amp
				RB1	del
52	Hepatobiliary	CHOL	IHCH	BRAF	SSV	V600E
				MYC	amp
53	Sarcoma	ANGS	ANGS	n/a
54	Lower GI Tract	COADREAD	COADREAD	APC	SSV	E1306*
				TP53	SSV	R110L
				EGFR	amp
55	Hepatobiliary	HCC	HCC	IDH1	SSV	G7S
				PARP1	amp
56	Neuroendocrina	GINET	n/a (es gibt nur High grade NETs im colon und rectum bzw. gut diferenzierte NETs im dünndarm: HGNEC oder SBWDNET	CDK4	del
				MDM2	del
				FGFR3	amp
57	Hepatobiliary	CHOL	EHCH	TP53	SSV	R282W
				ERBB2	SSV	D769H
				ERBB2	amp
				CDKN2A	del
58	Breast	BRCA	IDC	TP53	SSV	R306*
				EGFR	del
				PIK3CB	amp
				JAK2	del
				CDKN2A	del
				RB1	del
				AKT3	amp
59	Lower GI Tract	COREAD	READ	KRAS	SSV	G13D
				TP53	SSV	L320Rfs
				APC	SSV	Q1294*
60	Pancreatobiliary	AMPCA	AMPCA	TP53	SSV	L130R
				KRAS	SSV	G12D
61	Lower GI Tract	COADREAD	COREAD	APC	SSV	Q879*
				MET	SSV	R970
				TP53	SSV	I195F
62	Head and Neck	SACA	SDCA	TP53	SSV	E298*
				MYC	amp
				ERBB2	amp
				CCNE1	amp
				IL2RA	amp
				CDK6	amp
				CDK14	amp
63	Sarcoma	MFH	MFH	CDKN2A	del
				TP53	del
				NRAS	amp
64	Lower GI Tract	COADREAD	COAD	TP53	SSV	S127Y
				KRAS	SSV	Q61H
				FLT3	amp
65	CUP	CUP	NETNOS	CDKN2A	del
66	Pancreatobiliary	AMPCA	AMPCA	KRAS	SSV	Q61H
67	CUP	CUP	CUP	CLDN18-ARHGAP26	Fusion
68	Pancreatobiliary	PAAD	PAAD	TP53	SSV	Q192*
				EML4-ALK	Fusion
				SMAD4	del
				BRCA	del
				MYC	amp
69	Sarcoma	LIPO	DDLS	FGFR1	amp
				CDK4	amp
				MDM2	amp
				DDR2	amp
70	Pancreatobiliary	PAAD	PAAD	KRAS	SSV	G12V
				TP53	SSV	R342*
71	Neuroendocrina	TNET	TNET	n/a
72	Neuroendocrina	CNE	CNE	TERT	amp
				IRS2	amp
73	Lower GI Tract	COADREAD	COAD	CCND1	amp
				CDKN2A	del
74	Sarcoma	SARCNOS	Chirurgen 8dr. Hemes anrufen - Einbestellen zur Auflärung, genaue vortherapien klären	n/a
75	Sarcoma	SARCNOS	SARCNOS	CDKN2A	del
76	Head and Neck	HNSC	HNSC	TP53	SSV	P60GfsTer63
77	Ovary	OVT	OVT	KRAS	SSV	G12A
				ARID1A	del
78	Ovary	OVT	HGSOC	APC	SSV	D1058G
				NOTCH1	SSV	Q1522R
				TP53	SSV	D247I
				PIK3CA	amp
				BCL6	amp
				MYC	amp
				CDKN2A	del
				RB1	del
79	Sarcoma	LMS	LMS	ATM	del
80	Lower GI Tract	APAD	SRAP	TP53	SSV	R290H
81	Lower GI Tract	COADREAD	COAD	KRAS	SSV	K117N
				RET	SSV	S649L
				STK11	SSV	E223K
				TP53	SSV	E285K
82	Hepatobiliary	CHOL	IHCH	FGFR2-ARHGAP24	Fusion
83	Gynecologic (non-ovarian)	UCEC	UCS	ERBB2	SSV	A386D
				TP53	del
				STK11	del
				TP53	SSV	K132R
84	Head and Neck	SACA	ACYC	ATM	SSV	R337C
				ERBB2	amp
				PIK3CA	amp
85	Hepatobiliary	CHOL	EHCH	CDKN2A	SSV	R80*
				ERBB2	SSV	D769Y
				MET	SSV	R790C
				PIK3CA	SSV	E545K
				SMAD4	SSV	D493H
				TP53	SSV	R175H
86	Neuroendocrina	GINET	HGNEC	ATM	SSV	S333F
				STK11	SSV	M392V
				TP53	SSV	R196*
				CCNE1	amp
87	Lower GI Tract	COADREAD	READ	TP53	SSV	splice site mutation chr17:7579310 A>G
				ERBB2	amp
				CDK12	amp
88	Hepatobiliary	CHOL	IHCH	KRAS	SSV	Q22K
				TP53	SSV	M340K
89	Germ cell tumor	NSGCT	EMBCA	n/a
90	Lower GI Tract	COADEAD	COAD	n/a
91	Lower GI Tract	ANSC	ANSC	PMS2	del
92	Breast	BRCA	SPC	TP53	SSV	R209K*fs6
				CCNE1	amp
				GATA3	amp
93	Thoracic malignany	TET	THYC	MET	SSV	D1010H / exon 14 skipping Mutation
				CDKN2A	del
94	Neuroendocrina	LIMNET	LIMNET	CDK4	amp
				ERBB3	amp
				MDM2	amp
				CDK17	amp
				HLA genes	amp
				VEGFA	amp
95	Hepatobiliary	CHOL	EHCH	ERBB3	SSV	V119L
96	Lower GI Tract	COADREAD	COAD	APC	SSV	T1556Nfs*3
				KRAS	SSV	G12D
				SMAD4	del
97	Thoracic malignany	LNET	SCLC	AKT1	SSV	E17K
				CDH1	SSV	A298T
				CDKN2A	SSV	A198T
				JAK3	SSV	V722I
				TP53	SSV	K320Ifs*10
98	Neuroendocrina	MIXED	MIXED	KRAS	SSV	A146T
				TP53	SSV	E221*
99	Neuroendocrina	GINET	HGNEC	APC	SSV	E1309*
				FBXW7	SSV	R658Q
				HNF1A	SSV	P291Qfs*51
				MET	SSV	T1010I
				MET	SSV	N375S
				PIK3R1	SSV	R348*
				RB1	SSV	E137*
				TP53	SSV	R174*
				TP53	SSV	R178*
100	Pancreatobiliary	PAAC	PAAC	CDKN2A	SSV	G61*
				KRAS	SSV	G12V
				SMAD4	SSV	D351G
101	Head and Neck	SACA	SDCA	HRAS	SSV	Q61R
				PIK3CA	SSV	E542K
				TP53	SSV	L130V
102	Breast	BRCA	BRCNOS	MET	SSV	L376R
				TP53	SSV	R110P
				JAK2	amp
				MYC	amp
				GATA3	amp
				PTPN1	amp
103	Neuroendocrina	CUP	NETNOS	FBXW7	del
104	Ovary	OVT	HGSOC	CDKN2A	SSV	V82M
				TP53	SSV	I195T
